# Supplementary material for: Evolutionary transcriptomics implicates new genes and pathways in human pregnancy and adverse pregnancy outcomes
Source: eLife. 2021 Oct 8;10:e69584. doi: 10.7554/eLife.69584 (PMC8660021; doi:10.7554/eLife.69584)
Supplement: Figure 1—source data 1. [file elife-69584-fig1-data1.xlsx]

## Sheet: Sheet1
Figure 1 — source data 1. Species names (common and binomial), genome annotations used for RNA-Seq analysis and parity mode.
Common name	Binomial	Genome v. (link)	Reproductive mode	Placenta type	Transcriptome type	Acession
Human	Homo sapiens	GRCh38.p13	Viviparous	Hemochorial	RNA-Seq/Kallisto	SRX890434, SRX890462, SRX890518
Baboon	Papio anubis	Panu_3.0	Viviparous	Hemochorial	RNA-Seq/Kallisto	GSE155170
Rhesus monkey	Macaca mulatta	Mmul_10	Viviparous	Hemochorial	RNA-Seq/Kallisto	SRX087151, SRX087152
Rabbit	Oryctolagus cuniculus	OryCun2.0	Viviparous	Hemochorial	RNA-Seq/Kallisto	SRX1489435, SRX1489436, SRX1489437
Thirteen-lined ground squirrel	Ictidomys tridecemlineatus	SpeTri2.0	Viviparous	Hemochorial	RNA-Seq/Kallisto	GSE155170
Seba's short-tailed bat	Carollia perspicillata	CarPer_v1_BIUU	Viviparous	Hemochorial	RNA-Seq/Kallisto	GSE155170
Golden Hamster	Mesocricetus auratus	MesAur1.0	Viviparous	Hemochorial	RNA-Seq/Kallisto	GSE155170
Mouse	Mus musculus	GRCm38.p6	Viviparous	Hemochorial	RNA-Seq/Kallisto	SRR5558617
Goat	Capra hircus	ARS1	Viviparous	Hemochorial	RNA-Seq/Kallisto	SRX958169
Dog	Canis lupus familiaris	CanFam3.1	Viviparous	Endotheliochorial	RNA-Seq/Kallisto	GSE57714
Cow	Bos taurus	ARS-UCD1.2	Viviparous	Epitheliochorial	RNA-Seq/Kallisto	GSE155170
Horse	Equus caballus	EquCab3.0	Viviparous	Epitheliochorial	RNA-Seq/Kallisto	GSE155170
Pig	Sus scrofa	Sscrofa11.1	Viviparous	Epitheliochorial	RNA-Seq/Kallisto	GSE43667
Armadillo	Dasypus novemcinctus	Dasnov3.0	Viviparous	Hemochorial	RNA-Seq/Kallisto	GSE30708
Short-tailed opossum	Monodelphis domestica	MonDom5	Viviparous	Epitheliochorial	RNA-Seq/Kallisto	GSE57714
Tamar wallaby	Notamacropus eugenii	Meug_1.1	Viviparous	Epitheliochorial	RNA-Seq/Kallisto	DRX012238, DRX012239, DRX012257, DRX012240
Fat-tailed dunnart	Sminthopsis crassicaudata	de novo	Viviparous	Endotheliochorial	RNA-Seq	SRX3108600, SRX3108599, SRX3108597
Platypus	Ornithorhynchus anatinus	mOrnAna1.p.v1	Oviparous	NA	RNA-Seq/Kallisto	GSE57714
Southern grass skink	Pseudemoia entrecasteauxii	de novo	Viviparous	epithelialchorial	RNA-Seq	SRX498626, SRX498625, SRX498615, SRX497586, SRX497584, SRX497582
Bougainville's skink	Lerista bougainvillii	de novo	Oviparous	Epitheliochorial	RNA-Seq	SRX2188820, SRX2188819, SRX2188818, SRX2188817
Common garden skink	Lampropholis guichenoti	de novo	Oviparous	NA	RNA-Seq	SRX2188824, SRX2188823, SRX2188822, SRX2188821
Ocellated skink	Chalcides ocellatus	de novo	Viviparous	Epit/Endo-theliochorial	RNA-Seq	NA
Three-toed skink	Saiphos equalis	de novo	Oviparous	NA	RNA-Seq	PRJNA533161
Three-toed skink	Saiphos equalis	de novo	Viviparous	Epitheliochorial	RNA-Seq	PRJNA533161
Chicken	Gallus gallus	GRCg6a	Oviparous	NA	RNA-Seq/Kallisto	SRX180570
Guinea fowl	Numida meleagris	NumMel1.0	Oviparous	NA	RNA-Seq/Kallisto	SRR5482408
Mallard	Anas platyrhynchos	IASCAAS_PekingDuck_PBH1.5	Oviparous	NA	RNA-Seq/Kallisto	SRR7031356
Rat	Rattus norvegicus	RGSC Rnor_6.0	Viviparous	Hemochorial	RNA-Seq/Kallisto	SRX471679
Pig-Tailed Macaque	Macaca nemestrina	NA	Viviparous	Hemochorial	Microarray	GSE63274
Zebu	Bos indicus	Bos_indicus_1.0	Viviparous	Epitheliochorial	RNA-Seq/Kallisto	SRR1685980
Mouflon	Ovis orientalis orientalis	Oar_rambouillet_v1.0	Viviparous	Epitheliochorial	RNA-Seq/Kallisto	SRR7062131
Finnsheep	Ovis aries	Oar_rambouillet_v1.0	Viviparous	Epitheliochorial	RNA-Seq/Kallisto	SRR7062126
Water Buffalo	Bubalus bubalis	UOA_WB_1	Viviparous	Epitheliochorial	RNA-Seq/Kallisto	PRJEB25226
Przewalski's toadhead agama	Phrynocephalus przewalskii	de novo	Oviparous	NA	RNA-Seq	CNP0000203
Qinghai toadhead agama	Phrynocephalus vlngalii	de novo	Viviparous	Epitheliochorial	RNA-Seq	CNP0000203
