# Supplementary material for: Evolutionary transcriptomics implicates new genes and pathways in human pregnancy and adverse pregnancy outcomes
Source: eLife. 2021 Oct 8;10:e69584. doi: 10.7554/eLife.69584 (PMC8660021; doi:10.7554/eLife.69584)
Supplement: Figure 1—source data 3. [file elife-69584-fig1-data3.csv]

Human	1	1	1	1	1	1	1	1	1	1	1	1	1	1	0	1	1	1	0	0	1	1	1	1	1	1	0	1	1	1	1	1	1	1	1	1	1	1	1	1	1	1	1	1	1	1	1	1	1
Armadillo	1	0	1	1	1	NA	1	1	1	0	1	1	1	1	0	1	1	1	1	NA	1	1	1	1	1	0	0	NA	1	1	1	NA	0	1	NA	0	1	1	1	1	1	1	1	0	1	1	NA	1	NA
Baboon	1	0	1	1	1	1	1	1	1	0	1	1	1	1	0	1	1	1	1	NA	1	1	1	0	0	0	0	1	1	1	1	1	1	1	1	0	1	1	1	1	1	1	1	1	1	0	1	1	1
Bat	1	0	1	0	NA	NA	1	NA	1	0	1	1	1	NA	0	1	1	1	1	NA	1	NA	NA	0	NA	0	0	1	1	1	0	1	1	0	0	NA	1	NA	1	0	NA	1	0	0	1	0	1	1	1
Chalcides	1	NA	1	NA	1	NA	1	1	1	NA	1	NA	1	1	1	1	1	1	1	0	NA	1	1	1	NA	1	NA	NA	1	1	NA	1	1	1	1	1	1	1	1	1	NA	1	NA	1	NA	NA	1	1	1
Chicken	1	1	1	1	NA	NA	1	1	1	NA	1	1	1	1	1	1	NA	NA	0	NA	NA	1	1	1	NA	1	1	1	1	1	NA	1	1	NA	1	NA	1	1	1	1	1	1	NA	0	1	0	1	1	1
Cow	1	1	1	1	1	NA	1	1	1	0	1	1	1	1	1	1	1	1	1	NA	1	1	1	1	0	1	1	1	1	1	1	1	1	1	1	NA	1	NA	1	NA	1	1	0	0	1	0	1	1	1
Dog	1	1	1	1	0	0	1	1	1	NA	1	1	1	1	NA	1	1	1	1	NA	NA	1	1	NA	NA	0	0	1	1	1	NA	1	NA	1	1	0	1	1	1	NA	NA	1	1	1	1	0	NA	1	1
Dunnart	NA	0	NA	NA	NA	NA	NA	1	NA	0	1	NA	1	1	0	1	1	1	NA	NA	NA	1	1	NA	1	0	0	NA	1	1	1	NA	NA	NA	NA	NA	1	NA	1	1	NA	NA	1	NA	NA	0	1	1	1
Goat	1	1	1	1	1	NA	1	1	1	0	1	1	1	1	1	1	1	1	1	NA	1	1	1	1	0	1	1	1	1	1	1	1	1	1	1	NA	1	NA	1	NA	1	1	0	0	1	1	1	1	1
Hamster	1	0	1	1	1	1	1	1	1	0	1	1	1	1	0	1	NA	1	1	NA	1	1	NA	1	NA	1	0	NA	1	1	NA	1	1	NA	1	0	1	NA	1	1	1	1	1	1	1	0	1	1	1
Horse	1	0	1	1	1	NA	1	1	1	1	1	1	1	1	0	1	1	1	1	NA	1	1	NA	1	0	0	0	1	1	1	1	1	1	1	1	NA	1	1	1	1	1	1	0	1	1	1	1	1	1
Lampropholis	NA	NA	1	1	NA	NA	1	1	1	1	NA	1	1	1	1	1	1	1	NA	NA	1	1	1	1	0	0	0	1	1	1	NA	1	NA	NA	1	1	1	1	1	1	1	1	NA	1	NA	0	1	1	1
Lerista	1	0	1	1	1	1	1	1	1	NA	1	1	1	1	1	1	1	1	1	NA	1	1	1	1	NA	1	0	1	1	1	0	1	NA	1	1	1	1	NA	1	1	1	1	NA	1	1	NA	NA	1	1
Opossum	NA	0	1	1	NA	NA	1	1	1	0	1	NA	1	1	0	1	1	1	1	NA	NA	1	1	NA	0	0	0	NA	1	1	1	NA	NA	NA	NA	NA	1	0	1	0	1	1	0	0	1	0	1	1	1
Pig	1	0	1	1	1	NA	1	1	NA	NA	1	1	NA	1	0	1	1	1	1	NA	1	NA	NA	1	0	0	NA	NA	NA	1	1	1	NA	1	NA	NA	1	1	1	0	1	1	1	0	1	NA	1	1	1
Platypus	1	0	1	1	1	NA	1	1	1	0	1	1	1	1	1	NA	1	NA	NA	NA	NA	1	1	1	NA	0	0	1	NA	1	NA	1	NA	0	1	NA	NA	NA	1	1	NA	1	NA	0	1	NA	1	NA	1
Pseudemoia	NA	NA	1	1	NA	NA	1	1	1	NA	NA	1	1	1	1	1	1	1	0	NA	1	1	1	1	NA	0	0	NA	1	1	NA	1	NA	0	1	0	1	1	1	1	NA	1	0	0	NA	0	NA	1	1
Rabbit	1	0	1	1	1	NA	NA	1	1	0	1	1	1	1	1	1	1	1	NA	NA	1	1	NA	1	1	0	1	NA	1	1	NA	1	1	1	1	NA	1	1	1	1	1	1	0	1	1	1	1	1	NA
SaiphosOvip	1	NA	1	1	1	1	1	1	1	NA	1	1	1	1	1	1	1	1	1	NA	1	1	1	1	NA	0	0	1	1	1	NA	1	1	0	1	1	1	1	1	1	1	1	NA	1	NA	1	0	1	1
SaiphosVivip	1	NA	1	1	1	1	1	1	1	NA	1	1	1	1	1	1	1	1	1	NA	1	1	1	1	NA	NA	NA	1	1	1	NA	1	1	1	1	0	1	1	1	1	1	1	NA	NA	NA	1	NA	1	1
Squirrel	1	0	1	1	1	NA	1	1	1	0	1	1	1	1	0	NA	1	1	1	NA	1	1	1	1	0	0	1	NA	1	1	1	1	1	0	1	NA	NA	1	1	1	1	1	NA	1	1	1	1	1	1
Wallaby	1	0	1	1	0	NA	NA	1	1	1	1	1	1	1	NA	NA	NA	1	NA	NA	1	1	NA	NA	0	0	0	1	1	1	NA	1	NA	0	1	NA	1	NA	1	1	1	1	0	0	NA	0	1	1	NA
Zebu	1	1	1	1	0	1	1	1	1	0	1	1	1	1	0	1	1	1	1	NA	1	1	1	1	0	0	0	1	1	1	1	1	1	0	1	1	1	NA	1	1	1	1	1	1	1	1	1	1	1
Rmacaque	1	0	1	1	1	1	1	1	1	0	1	1	1	1	0	1	1	1	1	NA	1	1	1	0	0	0	0	1	1	1	1	1	1	1	1	0	1	1	1	1	1	1	1	1	1	0	1	1	1
PhrynocephalusVivip	1	0	1	1	NA	1	1	1	1	1	1	1	1	1	1	1	1	1	0	0	1	1	NA	1	0	0	1	1	1	1	NA	1	1	1	1	0	1	1	1	1	1	1	0	0	NA	0	1	1	1
PhrynocephalusOvip	1	0	1	1	NA	1	1	1	1	1	1	1	1	1	1	1	1	1	1	0	NA	1	NA	1	0	0	1	1	1	1	NA	1	1	1	1	0	1	1	1	1	1	1	0	0	NA	0	1	1	1
Mouse	1	0	1	1	1	1	1	1	1	0	1	1	1	1	0	1	NA	1	1	NA	1	1	NA	1	1	0	0	1	1	1	1	1	1	1	1	0	1	NA	1	1	1	1	1	0	1	0	1	1	1
Rat	1	NA	1	1	0	1	1	1	1	0	1	1	1	1	0	1	NA	1	1	NA	1	1	1	1	1	1	0	1	1	1	1	1	1	1	1	0	1	NA	1	1	1	1	0	1	1	0	1	1	1
PTmacaque	1	0	1	1	1	1	1	1	1	0	1	1	1	1	0	1	1	1	1	NA	1	1	1	0	0	1	0	1	1	1	1	1	1	1	1	0	1	1	1	1	1	1	1	1	1	0	1	1	1
Duck	1	1	1	1	NA	NA	1	1	1	NA	NA	1	1	NA	1	1	NA	1	1	NA	NA	1	1	1	NA	0	0	1	1	NA	NA	1	1	NA	1	1	1	NA	1	0	1	1	0	0	1	0	1	1	1
Guineafowl	1	0	1	1	1	1	1	1	1	NA	1	1	NA	1	1	1	NA	1	0	NA	NA	1	1	1	0	0	1	0	1	1	NA	1	1	NA	1	1	1	NA	1	1	1	1	0	0	NA	0	1	1	1
WaterBuffalo	1	1	1	1	0	NA	1	1	1	0	1	1	1	1	1	1	NA	1	1	NA	1	1	1	0	0	1	1	1	1	1	1	1	1	NA	1	1	1	NA	1	0	1	1	0	0	1	1	1	1	1
Finnsheep	1	1	1	1	0	NA	1	1	1	0	1	1	1	1	1	1	NA	1	1	NA	1	1	1	0	0	1	1	1	1	1	1	1	1	NA	1	1	1	NA	1	0	1	1	0	0	1	1	1	1	1
Mouflon	1	1	1	1	0	NA	1	1	1	0	1	1	1	1	1	1	NA	1	1	NA	1	1	1	0	0	1	1	1	1	1	1	1	1	NA	1	1	1	NA	1	0	1	1	0	0	1	1	1	1	1
39	1	0	1	1	NA	1	1	1	1	1	1	1	1	1	1	1	1	1	0	0	1	1	NA	1	0	0	1	1	1	1	NA	1	1	1	1	0	1	1	1	1	1	1	0	0	NA	0	1	1	1
42	NA	NA	1	1	NA	NA	1	1	1	1	NA	1	1	1	1	1	1	1	0	NA	1	1	1	1	0	0	0	1	1	1	NA	1	NA	0	1	0	1	1	1	1	1	1	0	0	NA	0	1	1	1
44	1	NA	1	1	1	1	1	1	1	NA	1	1	1	1	1	1	1	1	1	NA	1	1	1	1	NA	0	0	1	1	1	NA	1	1	0	1	0	1	1	1	1	1	1	NA	1	NA	1	0	1	1
43	1	0	1	1	1	1	1	1	1	NA	1	1	1	1	1	1	1	1	1	NA	1	1	1	1	NA	0	0	1	1	1	0	1	1	1	1	1	1	1	1	1	1	1	NA	1	1	1	0	1	1
41	1	0	1	1	1	1	1	1	1	1	1	1	1	1	1	1	1	1	0	NA	1	1	1	1	0	0	0	1	1	1	0	1	1	0	1	0	1	1	1	1	1	1	0	1	1	0	0	1	1
40	1	0	1	1	1	1	1	1	1	1	1	1	1	1	1	1	1	1	0	0	1	1	1	1	0	0	0	1	1	1	0	1	1	0	1	0	1	1	1	1	1	1	0	1	1	0	1	1	1
38	1	0	1	1	1	1	1	1	1	1	1	1	1	1	1	1	1	1	0	0	1	1	1	1	0	0	0	1	1	1	0	1	1	1	1	0	1	1	1	1	1	1	0	0	1	0	1	1	1
46	1	0	1	1	1	1	1	1	1	NA	1	1	1	1	1	1	NA	1	0	NA	NA	1	1	1	0	0	1	0	1	1	NA	1	1	NA	1	1	1	1	1	1	1	1	0	0	1	0	1	1	1
45	1	1	1	1	1	1	1	1	1	NA	1	1	1	1	1	1	NA	1	0	NA	NA	1	1	1	0	0	0	1	1	1	NA	1	1	NA	1	1	1	1	1	0	1	1	0	0	1	0	1	1	1
37	1	0	1	1	1	1	1	1	1	1	1	1	1	1	1	1	1	1	0	0	1	1	1	1	0	0	0	1	1	1	0	1	1	1	1	0	1	1	1	1	1	1	0	0	1	0	1	1	1
50	1	0	1	1	0	NA	NA	1	1	1	1	1	1	1	0	1	1	1	NA	NA	1	1	1	NA	0	0	0	1	1	1	1	1	NA	0	1	NA	1	NA	1	1	1	1	0	0	NA	0	1	1	1
49	1	0	1	1	0	NA	1	1	1	0	1	1	1	1	0	1	1	1	1	NA	1	1	1	NA	0	0	0	1	1	1	1	1	NA	0	1	NA	1	0	1	0	1	1	0	0	1	0	1	1	1
55	1	0	1	1	1	0	1	1	1	1	1	1	1	1	0	1	1	1	1	NA	1	1	1	1	0	0	0	1	1	1	1	1	1	1	1	0	1	1	1	1	1	1	0	1	1	1	1	1	1
59	1	1	1	1	0	1	1	1	1	0	1	1	1	1	0	1	1	1	1	NA	1	1	1	1	0	0	0	1	1	1	1	1	1	0	1	1	1	NA	1	1	1	1	0	0	1	0	1	1	1
58	1	1	1	1	0	1	1	1	1	0	1	1	1	1	1	1	1	1	1	NA	1	1	1	0	0	1	1	1	1	1	1	1	1	0	1	1	1	NA	1	0	1	1	0	0	1	1	1	1	1
61	1	1	1	1	0	NA	1	1	1	0	1	1	1	1	1	1	NA	1	1	NA	1	1	1	0	0	1	1	1	1	1	1	1	1	NA	1	1	1	NA	1	0	1	1	0	0	1	1	1	1	1
60	1	1	1	1	0	NA	1	1	1	0	1	1	1	1	1	1	1	1	1	NA	1	1	1	0	0	1	1	1	1	1	1	1	1	1	1	1	1	NA	1	0	1	1	0	0	1	1	1	1	1
57	1	1	1	1	0	1	1	1	1	0	1	1	1	1	1	1	1	1	1	NA	1	1	1	0	0	1	1	1	1	1	1	1	1	1	1	1	1	NA	1	0	1	1	0	0	1	1	1	1	1
56	1	0	1	1	0	1	1	1	1	0	1	1	1	1	0	1	1	1	1	NA	1	1	1	0	0	0	1	1	1	1	1	1	1	1	1	1	1	1	1	0	1	1	0	0	1	1	1	1	1
54	1	0	1	1	0	0	1	1	1	0	1	1	1	1	0	1	1	1	1	NA	1	1	1	0	0	0	0	1	1	1	1	1	1	1	1	1	1	1	1	0	1	1	0	0	1	1	1	1	1
53	1	0	1	1	0	0	1	1	1	0	1	1	1	1	0	1	1	1	1	NA	1	1	1	0	0	0	0	1	1	1	1	1	1	1	1	1	1	1	1	0	1	1	0	0	1	0	1	1	1
66	1	0	1	1	0	1	1	1	1	0	1	1	1	1	0	1	NA	1	1	NA	1	1	1	1	1	0	0	1	1	1	1	1	1	1	1	0	1	NA	1	1	1	1	0	0	1	0	1	1	1
65	1	0	1	1	1	1	1	1	1	0	1	1	1	1	0	1	NA	1	1	NA	1	1	1	1	1	1	0	1	1	1	1	1	1	1	1	0	1	NA	1	1	1	1	1	1	1	0	1	1	1
64	1	0	1	1	1	1	1	1	1	0	1	1	1	1	0	1	1	1	1	NA	1	1	1	1	0	0	0	1	1	1	1	1	1	0	1	0	1	1	1	1	1	1	1	1	1	0	1	1	1
63	1	0	1	1	1	1	1	1	1	0	1	1	1	1	0	1	1	1	1	NA	1	1	1	1	1	0	0	1	1	1	1	1	1	1	1	0	1	1	1	1	1	1	0	1	1	0	1	1	1
36	1	0	1	1	1	1	1	1	1	0	1	1	1	1	0	1	1	1	1	NA	1	1	1	0	0	1	0	1	1	1	1	1	1	1	1	0	1	1	1	1	1	1	1	1	1	0	1	1	1
68	1	0	1	1	1	1	1	1	1	0	1	1	1	1	0	1	1	1	1	NA	1	1	1	0	0	0	0	1	1	1	1	1	1	1	1	0	1	1	1	1	1	1	1	1	1	0	1	1	1
67	1	0	1	1	1	1	1	1	1	0	1	1	1	1	0	1	1	1	0	0	1	1	1	0	0	0	0	1	1	1	1	1	1	1	1	0	1	1	1	1	1	1	1	1	1	0	1	1	1
62	1	0	1	1	1	1	1	1	1	0	1	1	1	1	0	1	1	1	1	0	1	1	1	1	0	0	0	1	1	1	1	1	1	1	1	0	1	1	1	1	1	1	1	1	1	0	1	1	1
52	1	0	1	1	1	1	1	1	1	0	1	1	1	1	0	1	1	1	1	0	1	1	1	1	0	0	0	1	1	1	1	1	1	1	1	0	1	1	1	0	1	1	0	0	1	0	1	1	1
51	1	0	1	1	1	1	1	1	1	0	1	1	1	1	0	1	1	1	1	0	1	1	1	1	0	0	0	1	1	1	1	1	1	1	1	0	1	1	1	1	1	1	0	0	1	0	1	1	1
48	1	0	1	1	1	1	1	1	1	0	1	1	1	1	0	1	1	1	1	0	1	1	1	1	0	0	0	1	1	1	1	1	1	1	1	0	1	1	1	0	1	1	0	0	1	0	1	1	1
47	1	0	1	1	1	1	1	1	1	0	1	1	1	1	0	1	1	1	1	0	1	1	1	1	0	0	0	1	1	1	1	1	1	0	1	0	1	1	1	1	1	1	0	0	1	0	1	1	1
nR	1	0	1	1	1	1	1	1	1	0	1	1	1	1	1	1	1	1	0	0	1	1	1	1	0	0	0	1	1	1	1	1	1	0	1	0	1	1	1	1	1	1	0	0	1	0	1	1	1
[truncated: 5,000 more columns]
