# Supplementary material for: Evolutionary transcriptomics implicates new genes and pathways in human pregnancy and adverse pregnancy outcomes
Source: eLife. 2021 Oct 8;10:e69584. doi: 10.7554/eLife.69584 (PMC8660021; doi:10.7554/eLife.69584)
Supplement: Figure 5—source data 1. [file elife-69584-fig5-data1.xls]

## Sheet: DEGs HTR2-pos vs HTR2-neg
Genes that are differentially expressed between HTR2B+ and HTR2B- deidual stromal cells.
Gene	p_val	avg_logFC	pct.1	pct.2	p_val_adj	gene
REN	5.07904e-08	-2.31489	0.189	0.242	0.00133132	REN
RGS5	3.11673e-36	-1.77951	0.107	0.23	8.16958e-32	RGS5
NDUFA4L2	6.14991e-40	-1.03792	0.052	0.171	1.61201e-35	NDUFA4L2
MGP	9.33113e-88	-0.923942	0.874	0.936	2.44588e-83	MGP
IFITM1	4.0495e-83	-0.708741	0.459	0.669	1.06146e-78	IFITM1
ADIRF	2.58494e-30	-0.687003	0.201	0.321	6.77563e-26	ADIRF
MT2A	1.99021e-33	-0.681299	0.59	0.697	5.21674e-29	MT2A
CXCL13	3.23918e-21	-0.669543	0.093	0.183	8.49054e-17	CXCL13
PTGDS	1.21871e-21	-0.633734	0.888	0.844	3.19449e-17	PTGDS
CCL2	3.68296e-34	-0.619161	0.109	0.239	9.65379e-30	CCL2
COL18A1	2.08774e-32	-0.609494	0.502	0.617	5.47239e-28	COL18A1
PTP4A3	4.10522e-24	-0.542669	0.056	0.14	1.07606e-19	PTP4A3
BGN	1.2309e-36	-0.535656	0.213	0.352	3.22642e-32	BGN
IFITM3	9.59425e-168	-0.489017	0.988	0.995	2.51484e-163	IFITM3
TPPP3	2.97967e-51	-0.484242	0.06	0.208	7.81031e-47	TPPP3
CSRP2	1.26602e-27	-0.482295	0.086	0.188	3.31849e-23	CSRP2
PLA2G2A	9.33929e-27	-0.479752	0.576	0.644	2.44801e-22	PLA2G2A
COL3A1	1.83042e-25	-0.466994	0.781	0.847	4.79789e-21	COL3A1
TINAGL1	4.33103e-52	-0.45521	0.037	0.179	1.13525e-47	TINAGL1
COL4A1	2.59513e-33	-0.453207	0.6	0.718	6.80237e-29	COL4A1
ACTA2	1.17804e-56	-0.443515	0.906	0.941	3.08789e-52	ACTA2
PPP1R14A	1.51655e-64	-0.438134	0.702	0.827	3.97519e-60	PPP1R14A
COL4A2	6.09392e-37	-0.413336	0.605	0.728	1.59734e-32	COL4A2
COL1A2	7.26598e-12	-0.409961	0.769	0.833	1.90456e-07	COL1A2
SPARC	2.67364e-21	-0.405497	0.949	0.963	7.00815e-17	SPARC
ACTG2	3.11662e-25	-0.399412	0.037	0.12	8.16928e-21	ACTG2
GPX3	5.12702e-17	-0.398589	0.238	0.326	1.34389e-12	GPX3
PHLDA1	5.33671e-28	-0.392674	0.248	0.371	1.39886e-23	PHLDA1
ARHGDIB	5.71478e-33	-0.390668	0.077	0.19	1.49796e-28	ARHGDIB
GEM	1.97245e-40	-0.389415	0.259	0.415	5.1702e-36	GEM
CST3	4.91859e-88	-0.37553	0.999	0.999	1.28926e-83	CST3
RPL36A	1.98294e-83	-0.373645	0.943	0.968	5.19769e-79	RPL36A
HES1	6.5782e-30	-0.365222	0.093	0.204	1.72428e-25	HES1
BST2	5.05036e-35	-0.349098	0.184	0.321	1.3238e-30	BST2
TSC22D1	9.34125e-12	-0.343622	0.377	0.451	2.44853e-07	TSC22D1
CD9	3.46057e-20	-0.335855	0.05	0.123	9.07084e-16	CD9
COL1A1	2.6041e-06	-0.335392	0.801	0.863	0.0682586	COL1A1
FABP5	7.12045e-20	-0.327025	0.48	0.57	1.86641e-15	FABP5
NOTCH3	4.80578e-38	-0.324581	0.072	0.196	1.25969e-33	NOTCH3
IER3	3.15453e-18	-0.324379	0.342	0.44	8.26865e-14	IER3
CXCL2	2.27345e-10	-0.323478	0.158	0.221	5.95917e-06	CXCL2
CKB	1.16512e-43	-0.321951	0.465	0.616	3.05402e-39	CKB
MYLK	2.55105e-42	-0.316929	0.33	0.503	6.68682e-38	MYLK
MYC	3.64276e-46	-0.313847	0.658	0.78	9.54841e-42	MYC
CAV1	2.30671e-09	-0.313707	0.7	0.729	6.04636e-05	CAV1
MT1E	6.29995e-46	-0.303147	0.069	0.212	1.65134e-41	MT1E
GJA4	1.73325e-34	-0.299855	0.015	0.106	4.5432e-30	GJA4
BTG1	2.40079e-33	-0.294161	0.795	0.873	6.29295e-29	BTG1
TAGLN	1.00257e-38	-0.291542	0.928	0.961	2.62793e-34	TAGLN
ATF3	1.48936e-41	-0.287301	0.622	0.748	3.90391e-37	ATF3
MYH11	4.80903e-42	-0.286653	0.078	0.219	1.26054e-37	MYH11
OAZ2	0.000118065	-0.283997	0.518	0.554	1	OAZ2
ID3	9.96438e-11	-0.280644	0.371	0.447	2.61186e-06	ID3
RPL37	1.8688e-67	-0.28021	0.992	0.994	4.89849e-63	RPL37
MEF2C	4.17769e-25	-0.276694	0.093	0.192	1.09505e-20	MEF2C
CRIP2	3.19857e-23	-0.274652	0.091	0.181	8.3841e-19	CRIP2
MTHFD2	4.23849e-39	-0.272242	0.39	0.542	1.11099e-34	MTHFD2
RPL38	1.52414e-67	-0.272017	0.971	0.979	3.99507e-63	RPL38
EPS8	7.14779e-17	-0.271099	0.369	0.458	1.87358e-12	EPS8
GNLY	1.30673e-15	-0.270509	0.251	0.346	3.42519e-11	GNLY
FRZB	1.73182e-30	-0.267515	0.017	0.101	4.53944e-26	FRZB
PLAC9	2.90175e-29	-0.256163	0.462	0.583	7.60606e-25	PLAC9
ZFP36	1.71349e-41	-0.254931	0.971	0.987	4.49139e-37	ZFP36
IGFBP7	1.4414e-17	-0.254862	0.998	0.999	3.7782e-13	IGFBP7
RPL37A	2.72174e-61	-0.254467	0.996	0.997	7.13422e-57	RPL37A
CNN3	4.07738e-39	-0.252966	0.749	0.855	1.06876e-34	CNN3
MAP3K5	6.76021e-47	0.250641	0.368	0.219	1.77199e-42	MAP3K5
DHRS3	2.72853e-18	0.251182	0.464	0.384	7.15202e-14	DHRS3
PALMD	2.92089e-45	0.252374	0.612	0.464	7.65624e-41	PALMD
FBLN1	1.21327e-51	0.253733	0.962	0.904	3.18023e-47	FBLN1
MMP14	8.40367e-38	0.254207	0.796	0.718	2.20277e-33	MMP14
INSR	4.15257e-23	0.25654	0.618	0.517	1.08847e-18	INSR
OMD	1.05538e-49	0.256616	0.539	0.383	2.76637e-45	OMD
TGM2	2.81555e-48	0.260026	0.936	0.877	7.38013e-44	TGM2
FKBP1A	7.60065e-58	0.260617	0.952	0.942	1.99228e-53	FKBP1A
IL1R2	1.46849e-29	0.261274	0.151	0.072	3.8492e-25	IL1R2
UBE2D1	1.04032e-52	0.262542	0.695	0.574	2.72689e-48	UBE2D1
CLU	1.39565e-14	0.263103	0.473	0.409	3.65827e-10	CLU
NDP	8.27581e-31	0.26319	0.219	0.123	2.16926e-26	NDP
IGFBP4	4.21715e-68	0.26594	0.985	0.968	1.1054e-63	IGFBP4
CTSK	3.51288e-20	0.266253	0.749	0.691	9.20795e-16	CTSK
MAOB	5.29176e-31	0.266688	0.731	0.635	1.38708e-26	MAOB
GAS1	3.32338e-37	0.267593	0.647	0.524	8.71125e-33	GAS1
CFL2	5.01073e-55	0.267658	0.775	0.671	1.31341e-50	CFL2
PRLR	1.75805e-76	0.26775	0.446	0.247	4.6082e-72	PRLR
GLB1L2	8.79406e-47	0.268518	0.518	0.358	2.3051e-42	GLB1L2
PRDM1	4.724e-53	0.268664	0.497	0.322	1.23825e-48	PRDM1
ATP6V0E1	1.43336e-44	0.270577	0.92	0.903	3.75713e-40	ATP6V0E1
PLPP1	1.2625e-47	0.271126	0.93	0.852	3.30927e-43	PLPP1
RHEB	9.96032e-58	0.273194	0.865	0.814	2.6108e-53	RHEB
MXRA8	3.66655e-66	0.273624	0.913	0.86	9.61076e-62	MXRA8
IGFBP6	1.35485e-38	0.277433	0.936	0.882	3.55132e-34	IGFBP6
TXN	9.61969e-49	0.277534	0.971	0.976	2.52151e-44	TXN
APOO	4.34636e-46	0.277999	0.34	0.203	1.13927e-41	APOO
DNAJB9	1.08843e-30	0.278436	0.578	0.473	2.85299e-26	DNAJB9
BRE	6.94275e-39	0.279076	0.454	0.325	1.81983e-34	BRE
TMED10	3.65933e-57	0.279427	0.866	0.809	9.59184e-53	TMED10
CD82	9.59142e-43	0.28003	0.281	0.155	2.5141e-38	CD82
SH3BGRL3	1.70154e-37	0.282025	0.935	0.927	4.46008e-33	SH3BGRL3
ST3GAL5	6.33427e-52	0.284016	0.494	0.338	1.66034e-47	ST3GAL5
HAND2.AS1	6.76778e-62	0.284655	0.803	0.672	1.77397e-57	HAND2.AS1
TMBIM6	8.22946e-57	0.285884	0.908	0.877	2.15711e-52	TMBIM6
COX6C	1.57336e-86	0.286263	0.985	0.986	4.12409e-82	COX6C
LRPAP1	7.45821e-54	0.286781	0.869	0.833	1.95495e-49	LRPAP1
OSTF1	1.36493e-54	0.287374	0.586	0.438	3.57776e-50	OSTF1
RGS2	1.87844e-06	0.289135	0.328	0.29	0.0492377	RGS2
IL15	9.10327e-54	0.29057	0.722	0.589	2.38615e-49	IL15
PPDPF	3.89744e-30	0.293726	0.963	0.967	1.0216e-25	PPDPF
HIST1H1C	7.34785e-15	0.294444	0.229	0.162	1.92602e-10	HIST1H1C
ADM	6.29783e-12	0.295157	0.317	0.255	1.65079e-07	ADM
ID4	3.68549e-58	0.297337	0.763	0.606	9.66041e-54	ID4
LGALS3	1.29249e-43	0.299683	0.988	0.965	3.38787e-39	LGALS3
SOX4	7.2825e-14	0.305087	0.672	0.647	1.90889e-09	SOX4
UGDH	2.54556e-38	0.306233	0.631	0.521	6.67241e-34	UGDH
S100A16	3.25635e-65	0.306567	0.828	0.708	8.53555e-61	S100A16
TPST1	1.20683e-68	0.307591	0.737	0.593	3.16335e-64	TPST1
RGS22	2.87098e-72	0.30846	0.365	0.186	7.52541e-68	RGS22
PLAT	1.0167e-29	0.310916	0.609	0.509	2.66496e-25	PLAT
CHST2	7.05064e-61	0.31401	0.536	0.363	1.84811e-56	CHST2
MYDGF	4.34403e-46	0.315142	0.852	0.838	1.13866e-41	MYDGF
LGALS9	4.12361e-91	0.315726	0.421	0.208	1.08088e-86	LGALS9
MEST	1.27503e-62	0.317335	0.324	0.162	3.3421e-58	MEST
CLEC2B	3.07099e-60	0.322914	0.801	0.7	8.04967e-56	CLEC2B
PAPPA	1.60584e-22	0.323377	0.512	0.425	4.20923e-18	PAPPA
MRPL33	8.491e-07	0.323887	0.733	0.735	0.0222566	MRPL33
ISLR	8.76884e-76	0.32713	0.859	0.737	2.29849e-71	ISLR
CTSB	2.11256e-98	0.332037	0.957	0.916	5.53744e-94	CTSB
GJA1	7.60035e-68	0.336708	0.643	0.469	1.9922e-63	GJA1
CD55	2.06945e-59	0.336761	0.812	0.704	5.42443e-55	CD55
APOD	3.25522e-67	0.339491	0.987	0.927	8.53259e-63	APOD
MDK	2.06062e-78	0.339844	0.955	0.917	5.4013e-74	MDK
NAA20	1.5658e-84	0.340275	0.851	0.771	4.10428e-80	NAA20
FBLN5	7.25851e-83	0.342519	0.764	0.61	1.9026e-78	FBLN5
RAB18	2.82129e-36	0.343359	0.68	0.583	7.39517e-32	RAB18
RIN2	8.42448e-47	0.345649	0.536	0.385	2.20822e-42	RIN2
TMEM45A	2.16741e-32	0.345698	0.818	0.755	5.68121e-28	TMEM45A
ING1	1.56285e-48	0.347827	0.457	0.311	4.09654e-44	ING1
CHI3L2	5.78217e-64	0.349283	0.201	0.075	1.51562e-59	CHI3L2
OGN	2.82141e-42	0.349671	0.528	0.391	7.39547e-38	OGN
RAP1B	1.53804e-49	0.351061	0.675	0.566	4.03151e-45	RAP1B
CARHSP1	3.21574e-79	0.351096	0.785	0.657	8.42909e-75	CARHSP1
CPXM1	5.9018e-106	0.353437	0.964	0.888	1.54698e-101	CPXM1
C1QTNF6	5.43101e-91	0.354341	0.445	0.235	1.42358e-86	C1QTNF6
HSD11B1	1.25519e-47	0.356698	0.113	0.034	3.29011e-43	HSD11B1
WT1	2.18562e-93	0.360408	0.681	0.473	5.72895e-89	WT1
BASP1	1.36327e-72	0.361517	0.801	0.699	3.57339e-68	BASP1
ALDH1A1	7.98189e-74	0.367759	0.838	0.681	2.09221e-69	ALDH1A1
ANXA1	3.17884e-68	0.378347	0.816	0.717	8.33239e-64	ANXA1
CD68	2.61565e-46	0.380392	0.545	0.402	6.85615e-42	CD68
TM4SF1	4.51162e-39	0.383295	0.247	0.135	1.18259e-34	TM4SF1
C10orf10	8.66877e-47	0.397316	0.682	0.552	2.27226e-42	C10orf10
IL1B	8.41083e-70	0.403389	0.232	0.09	2.20465e-65	IL1B
CAB39L	3.55534e-127	0.40875	0.456	0.206	9.31925e-123	CAB39L
RORB	2.4074e-95	0.411776	0.718	0.526	6.31029e-91	RORB
VCAN	9.7303e-51	0.4119	0.816	0.743	2.55051e-46	VCAN
PAMR1	3.85337e-102	0.413384	0.626	0.382	1.01005e-97	PAMR1
PLA2G7	6.26878e-75	0.414366	0.541	0.353	1.64317e-70	PLA2G7
MMP2	1.25301e-112	0.4171	0.913	0.817	3.28439e-108	MMP2
CRYAB	3.32619e-07	0.418006	0.8	0.797	0.0087186	CRYAB
SARAF	9.03245e-150	0.431109	0.933	0.853	2.36759e-145	SARAF
FERMT2	3.20627e-74	0.433311	0.761	0.631	8.40428e-70	FERMT2
CPB1	3.69829e-16	0.442791	0.214	0.145	9.69396e-12	CPB1
RP1.78O14.1	1.27819e-113	0.446941	0.595	0.346	3.3504e-109	RP1.78O14.1
CTSL	2.2059e-87	0.454013	0.883	0.793	5.7821e-83	CTSL
NPC2	4.09086e-95	0.456963	0.931	0.891	1.0723e-90	NPC2
DKK1	2.82628e-76	0.462909	0.948	0.843	7.40824e-72	DKK1
CD59	4.24588e-72	0.463332	0.957	0.925	1.11293e-67	CD59
IGFBP2	2.75141e-118	0.464308	0.941	0.83	7.21199e-114	IGFBP2
ADAMTS5	4.4939e-100	0.487059	0.55	0.318	1.17794e-95	ADAMTS5
MMP10	2.52079e-49	0.508056	0.114	0.033	6.60749e-45	MMP10
MRPS6	1.27173e-99	0.52453	0.752	0.602	3.33345e-95	MRPS6
RASGRP2	7.56306e-53	0.549773	0.555	0.407	1.98243e-48	RASGRP2
MGST1	5.31951e-42	0.578091	0.72	0.619	1.39435e-37	MGST1
SAT1	1.8734e-164	0.579769	0.991	0.958	4.91055e-160	SAT1
EFEMP1	8.4155e-114	0.58097	0.81	0.641	2.20587e-109	EFEMP1
F3	8.81114e-121	0.581694	0.753	0.539	2.30958e-116	F3
GLRX	1.30178e-26	0.585799	0.583	0.509	3.41224e-22	GLRX
GADD45G	2.82509e-97	0.599172	0.725	0.509	7.40512e-93	GADD45G
GLUL	2.67517e-96	0.613308	0.889	0.812	7.01215e-92	GLUL
MFAP4	1.32509e-98	0.621717	0.778	0.616	3.47332e-94	MFAP4
SLC40A1	3.22692e-133	0.630967	0.564	0.31	8.45839e-129	SLC40A1
CITED2	1.61644e-87	0.689929	0.807	0.68	4.23701e-83	CITED2
LEFTY2	1.58048e-92	0.741561	0.503	0.285	4.14275e-88	LEFTY2
RBP1	2.35262e-264	0.776526	0.99	0.943	6.16669e-260	RBP1
DCN	0	0.796215	0.999	0.989	0	DCN
APOA1	1.14474e-15	0.822392	0.191	0.128	3.0006e-11	APOA1
TIMP3	7.48355e-167	0.84587	0.988	0.965	1.96159e-162	TIMP3
CXCL14	3.60388e-22	0.885862	0.262	0.178	9.4465e-18	CXCL14
IGFBP3	3.88086e-215	0.89086	0.913	0.709	1.01725e-210	IGFBP3
LUM	0	0.922216	0.999	0.988	0	LUM
RGCC	2.50891e-12	0.989393	0.406	0.35	6.57635e-08	RGCC
PRL	1.62604e-16	1.24302	0.193	0.13	4.26219e-12	PRL
HTR2B	0	1.40931	1	0	0	HTR2B
IGFBP1	1.86417e-141	1.58702	0.894	0.771	4.88635e-137	IGFBP1

## Sheet: Enriched pathways
Pathways that are enriched among genes that differentially expressed between HTR2B+ and HTR2B- deidual stromal cells.
Gene Set	Description	Size	Expect	Ratio	P Value	FDR
R-HSA-381426	Regulation of Insulin-like Growth Factor (IGF) transport and uptake by Insulin-like Growth Factor Binding Proteins (IGFBPs)	125	1.6698	7.1863	1.0399e-07	4.6728e-05
WP4754	IL-18 signaling pathway	272	3.6336	4.4034	7.1583e-07	0.00024123
WP289	Myometrial Relaxation and Contraction Pathways	156	2.084	5.7582	1.1607e-06	0.00028709
WP615	Senescence and Autophagy in Cancer	105	1.4027	7.1293	1.34e-06	0.00028709
R-HSA-445355	Smooth Muscle Contraction	37	0.49427	10.116	0.00012362	0.011219
WP15	Selenium Micronutrient Network	89	1.1889	5.8876	0.00018404	0.015217
WP3876	BMP2-WNT4-FOXO1 Pathway in Human Primary Endometrial Stromal Cell Differentiation	13	0.17366	17.275	0.00060693	0.037188
R-HSA-76009	Platelet Aggregation (Plug Formation)	39	0.52099	7.6777	0.0017554	0.077585
WP98	Prostaglandin Synthesis and Regulation	45	0.60115	6.654	0.0029887	0.11038
WP2873	Aryl Hydrocarbon Receptor Pathway	46	0.6145	6.5093	0.0032398	0.11646
R-HSA-1442490	Collagen degradation	64	0.85496	14.036	3.9167e-11	1.0559e-07
R-HSA-1474244	Extracellular matrix organization	301	4.021	5.4713	8.3386e-11	1.124e-07
R-HSA-1474228	Degradation of the extracellular matrix	140	1.8702	7.4857	5.0714e-09	4.5575e-06
WP2431	Spinal Cord Injury	118	1.5763	7.6126	5.4599e-08	3.3338e-05
R-HSA-3000178	ECM proteoglycans	76	1.0153	9.8496	6.1829e-08	3.3338e-05
R-HSA-3000480	Scavenging by Class A Receptors	19	0.25382	23.639	1.2211e-07	4.7029e-05
WP3888	VEGFA-VEGFR2 Signaling Pathway	431	5.7576	3.4736	1.2171e-06	0.00028709
R-HSA-2173782	Binding and Uptake of Ligands by Scavenger Receptors	42	0.56107	12.476	1.2193e-06	0.00028709
R-HSA-2022090	Assembly of collagen fibrils and other multimeric structures	61	0.81489	9.8173	1.3844e-06	0.00028709
hsa05418	Fluid shear stress and atherosclerosis	138	1.8435	5.9669	2.3182e-06	0.00044641
hsa04933	AGE-RAGE signaling pathway in diabetic complications	99	1.3225	6.8052	6.7635e-06	0.0012156
R-HSA-3560782	Diseases associated with glycosaminoglycan metabolism	41	0.54771	10.955	1.5864e-05	0.0026731
R-HSA-8948216	Collagen chain trimerization	44	0.58779	10.208	2.4095e-05	0.0038211
R-HSA-1474290	Collagen formation	90	1.2023	6.654	2.6244e-05	0.0039308
WP176	Folate Metabolism	69	0.92176	7.5942	3.6031e-05	0.0050403
R-HSA-2214320	Anchoring fibril formation	15	0.20038	19.962	3.7391e-05	0.0050403
R-HSA-1592389	Activation of Matrix Metalloproteinases	33	0.44084	11.342	7.0275e-05	0.0090219
R-HSA-2243919	Crosslinking of collagen fibrils	18	0.24046	16.635	8.1236e-05	0.0099551
R-HSA-8957275	Post-translational protein phosphorylation	108	1.4427	5.545	9.7264e-05	0.011219
R-HSA-3595172	Defective CHST3 causes SEDCJD	8	0.10687	28.071	0.00012484	0.011219
R-HSA-3595174	Defective CHST14 causes EDS, musculocontractural type	8	0.10687	28.071	0.00012484	0.011219
R-HSA-3595177	Defective CHSY1 causes TPBS	8	0.10687	28.071	0.00012484	0.011219
R-HSA-3656225	Defective CHST6 causes MCDC1	8	0.10687	28.071	0.00012484	0.011219
R-HSA-3656243	Defective ST3GAL3 causes MCT12 and EIEE15	8	0.10687	28.071	0.00012484	0.011219
R-HSA-3656244	Defective B4GALT1 causes B4GALT1-CDG (CDG-2d)	8	0.10687	28.071	0.00012484	0.011219
R-HSA-216083	Integrin cell surface interactions	85	1.1355	6.1647	0.00013785	0.011989
WP2911	miRNA targets in ECM and membrane receptors	22	0.29389	13.61	0.00018626	0.015217
hsa04974	Protein digestion and absorption	90	1.2023	5.8222	0.00019734	0.015648
WP474	Endochondral Ossification	64	0.85496	7.0179	0.00020531	0.015815
R-HSA-1650814	Collagen biosynthesis and modifying enzymes	67	0.89504	6.7036	0.00026442	0.019802
hsa05146	Amoebiasis	96	1.2824	5.4583	0.00029446	0.021456
R-HSA-2022923	Dermatan sulfate biosynthesis	11	0.14695	20.416	0.00035711	0.025336
R-HSA-2022854	Keratan sulfate biosynthesis	28	0.37405	10.694	0.0004898	0.033859
WP1533	Vitamin B12 Metabolism	50	0.66794	7.4857	0.00052246	0.034383
R-HSA-3781865	Diseases of glycosylation	138	1.8435	4.3395	0.00052288	0.034383
R-HSA-1679131	Trafficking and processing of endosomal TLR	13	0.17366	17.275	0.00060693	0.037188
R-HSA-2022857	Keratan sulfate degradation	13	0.17366	17.275	0.00060693	0.037188
WP129	Matrix Metalloproteinases	30	0.40076	9.981	0.00064209	0.038468
WP2877	Vitamin D Receptor Pathway	182	2.4313	3.7017	0.00075165	0.043876
R-HSA-2024101	CS/DS degradation	14	0.18702	16.041	0.00076489	0.043876
R-HSA-76002	Platelet activation, signaling and aggregation	262	3.5	3.1429	0.00078611	0.044153
WP2817	Mammary gland development pathway - Pregnancy and lactation (Stage 3 of 4)	32	0.42748	9.3571	0.00082522	0.045404
R-HSA-1638074	Keratan sulfate/keratin metabolism	34	0.4542	8.8067	0.0010424	0.056206
R-HSA-3000171	Non-integrin membrane-ECM interactions	59	0.78817	6.3438	0.001121	0.059257
hsa05323	Rheumatoid arthritis	90	1.2023	4.9905	0.0012821	0.066473
R-HSA-1630316	Glycosaminoglycan metabolism	124	1.6565	4.2258	0.0013622	0.06801
WP3413	NOTCH1 regulation of human endothelial cell calcification	17	0.2271	13.21	0.0013874	0.06801
WP3967	miR-509-3p alteration of YAP1/ECM axis	17	0.2271	13.21	0.0013874	0.06801
R-HSA-168256	Immune System	1997	26.677	1.5744	0.0014266	0.068681
WP3624	Lung fibrosis	63	0.8416	5.941	0.0015078	0.071318
R-HSA-2129379	Molecules associated with elastic fibres	38	0.50763	7.8797	0.0015918	0.07399
R-HSA-114608	Platelet degranulation	129	1.7233	4.062	0.0017111	0.077585
P00034	Integrin signalling pathway	166	2.2176	3.6076	0.0017344	0.077585
hsa04926	Relaxin signaling pathway	130	1.7366	4.0308	0.0017886	0.077773
WP2806	Human Complement System	97	1.2958	4.6303	0.0018851	0.080669
R-HSA-8875878	MET promotes cell motility	41	0.54771	7.3031	0.0021171	0.086989
R-HSA-76005	Response to elevated platelet cytosolic Ca2+	134	1.7901	3.9104	0.002126	0.086989
P06959	CCKR signaling map	172	2.2977	3.4817	0.0021675	0.086989
R-HSA-3560783	Defective B4GALT7 causes EDS, progeroid type	20	0.26718	11.229	0.0022586	0.086989
R-HSA-3560801	Defective B3GAT3 causes JDSSDHD	20	0.26718	11.229	0.0022586	0.086989
R-HSA-4420332	Defective B3GALT6 causes EDSP2 and SEMDJL1	20	0.26718	11.229	0.0022586	0.086989
R-HSA-2022870	Chondroitin sulfate biosynthesis	20	0.26718	11.229	0.0022586	0.086989
P00016	Cytoskeletal regulation by Rho GTPase	71	0.94847	5.2716	0.0025642	0.097369

## Sheet: Enriched disease ontologies
Disease and human phenotype ontologies that are enriched among genes that differentially expressed between HTR2B+ and HTR2B- deidual stromal cells.
Gene Set	Description	Size	Expect	Ratio	P Value	FDR
PA445582	Rupture	144	1.6861	13.048	0	0
PA165108606	Preterm rupture of membranes	148	1.733	10.387	1.1668e-13	2.4924e-10
C0014175	Endometriosis	153	1.7915	10.047	2.0939e-13	3.3544e-10
PA443719	Chorioamnionitis	160	1.8735	9.074	5.3679e-12	4.2997e-09
PA444703	Obstetric Labor Complications	213	2.4941	7.618	6.5467e-12	4.6612e-09
PA444704	Premature Birth	196	2.295	7.4073	1.3892e-10	7.4183e-08
C0027626	Neoplasm Invasiveness	136	1.5925	8.7914	6.6239e-10	2.8297e-07
PA445058	Neoplasm Metastasis	451	5.2809	4.3553	2.9452e-09	1.0485e-06
C0000786	Spontaneous abortion	112	1.3114	9.1502	7.2668e-09	2.3283e-06
PA444620	Inflammation	554	6.4869	3.2373	2.1076e-06	0.00020462
PA445403	Pregnancy Complications	271	3.1732	4.4119	3.7286e-06	0.00033146
PA166048714	Pregnancy	340	3.9812	3.7677	1.1284e-05	0.00082168
C0023893	Liver Cirrhosis, Experimental	766	8.9693	5.0171	0	0
PA443678	Cerebrovascular Disorders	208	2.4355	8.2118	4.3099e-13	5.063e-10
C0020538	Hypertensive disease	292	3.4191	6.7269	4.7407e-13	5.063e-10
PA443359	Aneurysm	84	0.98358	14.234	8.3733e-13	7.6652e-10
PA446021	Vascular Diseases	432	5.0584	4.9423	3.9066e-11	2.5034e-08
PA443635	Cardiovascular Diseases	528	6.1825	4.3672	1.0007e-10	5.8293e-08
PA445078	Neoplastic Processes	545	6.3816	4.2309	2.0344e-10	1.0028e-07
PA443390	Aortic Aneurysm	68	0.79623	13.815	3.553e-10	1.6263e-07
PA445057	Neoplasm Invasiveness	395	4.6252	4.7566	1.3182e-09	5.2793e-07
PA443394	Aortic Rupture	59	0.69085	14.475	1.4314e-09	5.3955e-07
C0023890	Liver Cirrhosis	130	1.5222	8.5402	3.9519e-09	1.3328e-06
PA444185	Fibrosis	255	2.9859	5.6935	7.9467e-09	2.4249e-06
C0009375	Colonic Neoplasms	141	1.651	7.874	1.0683e-08	3.1116e-06
PA444552	Hypertension	304	3.5596	5.0567	1.8041e-08	5.0263e-06
C0017636	Glioblastoma	77	0.90162	11.091	2.0847e-08	5.5662e-06
PA445062	Neoplasms	821	9.6133	3.1207	2.3754e-08	6.0886e-06
PA446680	Neoplasms, Squamous Cell	509	5.96	3.859	2.8467e-08	7.016e-06
PA446459	Myocardial Ischemia	323	3.7821	4.7593	4.5729e-08	1.0733e-05
PA443751	Collagen Diseases	132	1.5456	7.7638	4.6897e-08	1.0733e-05
C4021797	Abnormality of the thorax	19	0.22248	26.969	5.6534e-08	1.2492e-05
PA444417	Hemorrhage	139	1.6276	7.3729	8.342e-08	1.7678e-05
PA443636	Carotid Artery Diseases	113	1.3231	8.3135	8.5519e-08	1.7678e-05
C0038356	Stomach Neoplasms	301	3.5245	4.8234	9.1094e-08	1.779e-05
C0020542	Pulmonary Hypertension	68	0.79623	11.303	9.1616e-08	1.779e-05
PA166048923	Osteolysis	34	0.39812	17.583	1.1021e-07	2.0771e-05
PA443362	Angina Pectoris	70	0.81965	10.98	1.185e-07	2.1696e-05
PA447054	Stroke	239	2.7985	5.36	1.3871e-07	2.4023e-05
PA165108178	Stroke NOS	239	2.7985	5.36	1.3871e-07	2.4023e-05
PA444645	Ischemia	210	2.459	5.6935	1.7597e-07	2.9674e-05
PA446020	Varicose Veins	78	0.91332	9.8541	3.0671e-07	5.0394e-05
PA446796	Muscle Neoplasms	129	1.5105	7.2824	3.3295e-07	5.3339e-05
PA443997	Ehlers-Danlos Syndrome	40	0.46837	14.945	3.6001e-07	5.6267e-05
PA161907438	Thoracic Aortic Aneurysms and Dissections (TAAD)	27	0.31615	18.978	5.7066e-07	8.4911e-05
PA443423	Arterial Occlusive Diseases	304	3.5596	4.4949	5.7332e-07	8.4911e-05
PA443393	Aortic Diseases	84	0.98358	9.1502	5.8304e-07	8.4911e-05
C0024667	Animal Mammary Neoplasms	137	1.6042	6.8571	6.1118e-07	8.53e-05
PA444613	Infarction	233	2.7283	5.1315	6.2447e-07	8.53e-05
PA445425	Prostatic Neoplasms	306	3.583	4.4655	6.2564e-07	8.53e-05
PA166123006	interstitial fibrosis	63	0.73769	10.845	6.7319e-07	8.987e-05
PA443610	Carcinoma	563	6.5923	3.3372	7.1127e-07	9.3016e-05
C0151744	Myocardial Ischemia	170	1.9906	6.0284	7.48e-07	9.5864e-05
PA445027	Myosarcoma	142	1.6627	6.6157	8.7492e-07	0.00010993
PA444941	Metaplasia	207	2.4238	5.3634	9.7007e-07	0.00011954
PA443671	Brain Ischemia	145	1.6978	6.4788	1.0773e-06	0.00012843
PA166128365	bone density	176	2.0608	5.8229	1.0823e-06	0.00012843
C0003504	Aortic Valve Insufficiency	30	0.35128	17.08	1.1118e-06	0.00012954
PA445174	Osteoarthritis	147	1.7213	6.3906	1.2342e-06	0.00014123
PA443669	Cerebral Hemorrhage	48	0.56205	12.455	1.3141e-06	0.00014773
PA446510	Aortic Aneurysm, Thoracic	31	0.36299	16.529	1.3654e-06	0.00014871
PA446997	Intracranial Hemorrhages	69	0.80794	9.9017	1.3692e-06	0.00014871
PA447242	epithelial cancers	409	4.7891	3.7585	1.4879e-06	0.00015891
PA165108343	Ebola virus disease	32	0.3747	16.013	1.6642e-06	0.00017482
C0024121	Lung Neoplasms	184	2.1545	5.5697	1.7309e-06	0.00017889
C4277682	Chemical and Drug Induced Liver Injury	185	2.1662	5.5396	1.8323e-06	0.00018637
C0024668	Mammary Neoplasms, Experimental	154	1.8032	6.1002	1.953e-06	0.00019555
PA166165020	adverse cardiovascular events	51	0.59717	11.722	2.0061e-06	0.00019777
PA444222	Fractures, Bone	126	1.4754	6.778	2.236e-06	0.00021386
PA446728	Disease Progression	225	2.6346	4.9344	2.4662e-06	0.0002324
PA445019	Myocardial Infarction	227	2.658	4.8909	2.7201e-06	0.00025261
C0018824	Heart valve disease	36	0.42153	14.234	3.4409e-06	0.00031499
C0033578	Prostatic Neoplasms	480	5.6205	3.3805	3.5782e-06	0.00032294
PA443670	Cerebral Infarction	56	0.65572	10.675	3.8257e-06	0.00033146
PA446155	Precursor Cell Lymphoblastic Leukemia-Lymphoma	165	1.932	5.6935	3.8277e-06	0.00033146
PA443796	Coronary Artery Disease	272	3.1849	4.3957	3.8913e-06	0.00033247
C0011853	Diabetes Mellitus, Experimental	107	1.2529	7.1834	4.511e-06	0.0003782
PA166123207	overall survival	488	5.7141	3.3251	4.5446e-06	0.0003782
PA166048784	Cerebral Arterial Diseases	38	0.44495	13.485	4.7833e-06	0.00039297
PA443626	Carcinoma, Squamous Cell	364	4.2622	3.7539	5.9583e-06	0.0004833
C2973725	Pulmonary arterial hypertension	40	0.46837	12.81	6.5229e-06	0.00050974
C3203102	Idiopathic pulmonary arterial hypertension	40	0.46837	12.81	6.5229e-06	0.00050974
PA446029	Ventricular Outflow Obstruction	40	0.46837	12.81	6.5229e-06	0.00050974
C0022658	Kidney Diseases	113	1.3231	6.802	7.0738e-06	0.00054613
C0016059	Fibrosis	41	0.48008	12.498	7.5674e-06	0.00057323
C0001418	Adenocarcinoma	114	1.3349	6.7423	7.6037e-06	0.00057323
C0042345	Varicosity	12	0.14051	28.467	8.3543e-06	0.00062249
PA443640	Cartilage Diseases	64	0.74939	9.3409	9.4724e-06	0.00069769
PA153619833	Peripheral Vascular Diseases	67	0.78452	8.9226	1.2875e-05	0.00092703
PA447053	Brain Infarction	68	0.79623	8.7914	1.4213e-05	0.0010119
PA446362	Cerebral Amyloid Angiopathy	46	0.53863	11.139	1.5019e-05	0.0010576
C4021630	Broad long bones	5	0.058546	51.241	1.5511e-05	0.0010803
PA166131631	glomerular filtration rate	125	1.4637	6.149	1.607e-05	0.0011073
C0018801	Heart failure	159	1.8618	5.3712	1.7762e-05	0.0012108
PA165108426	Small-for-dates baby	48	0.56205	10.675	1.9299e-05	0.0013018
PA445080	Neovascularization, Pathologic	201	2.3536	4.6738	2.484e-05	0.0016581
PA446487	Skin Diseases, Vascular	102	1.1943	6.6982	2.5879e-05	0.0017096
PA444184	Fibrosarcoma	75	0.8782	7.9709	2.7166e-05	0.0017763
PA166123204	bioavailability	103	1.2061	6.6332	2.7781e-05	0.0017982
C0029172	Oral Submucous Fibrosis	16	0.18735	21.351	2.9611e-05	0.0018799
