# Supplementary figures and images for: Evolutionary transcriptomics implicates new genes and pathways in human pregnancy and adverse pregnancy outcomes
Source: eLife journal article supplement (doi:10.7554/elife.69584), 2021-10-08

# GSE94036: Estrogen/Progesterone/cAMP vs Control (EtOH)

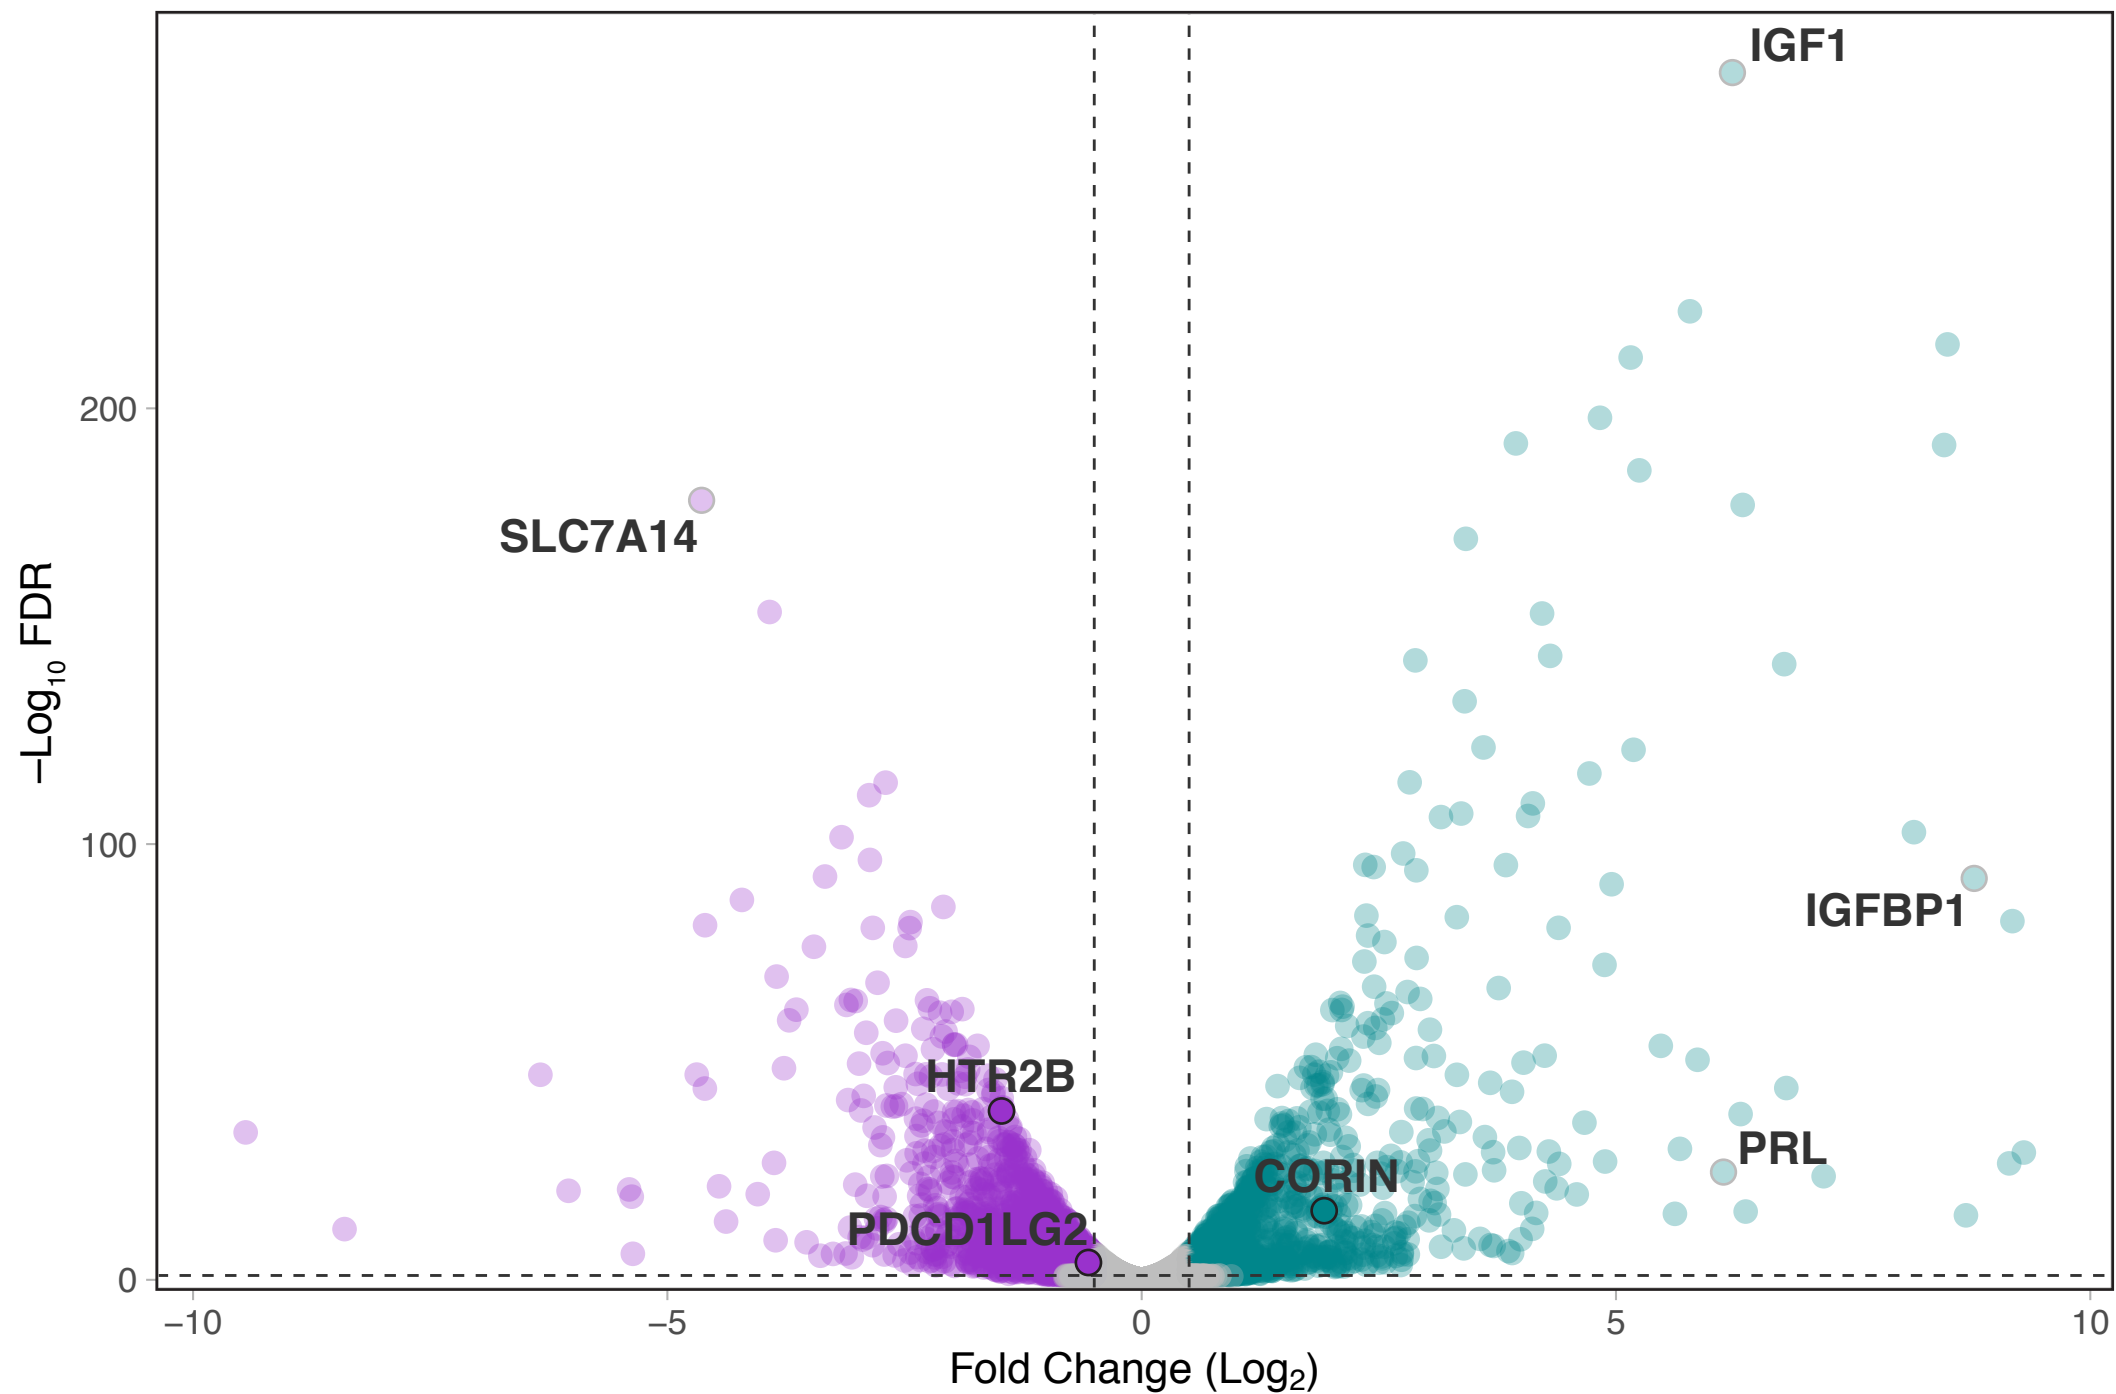

Supplement: supp [file elife-69584-supp-v1.zip]
